# Supplementary material for: Bacillus subtilis utilizes the DNA damage response to manage multicellular development
Source: PubMed Central journal article supplement (PMC5445613; doi:10.1038/s41522-017-0016-3), 2017-03-24
Supplement: 41522_2017_16_MOESM1_ESM.pdf [file 41522_2017_16_MOESM1_ESM.pdf]

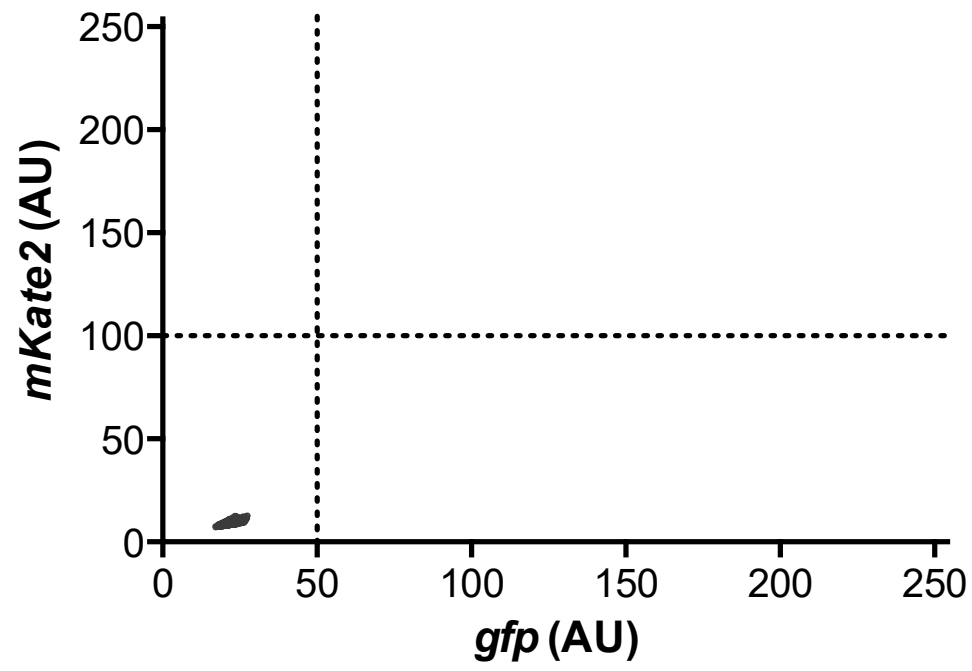

Figure S1

WT

$\Delta sda$

$\Delta sda$   
 $P_{sda}$ - $sda$

$\Delta lexA$

$\Delta lexA$   
 $P_{lexA}$ - $lexA$

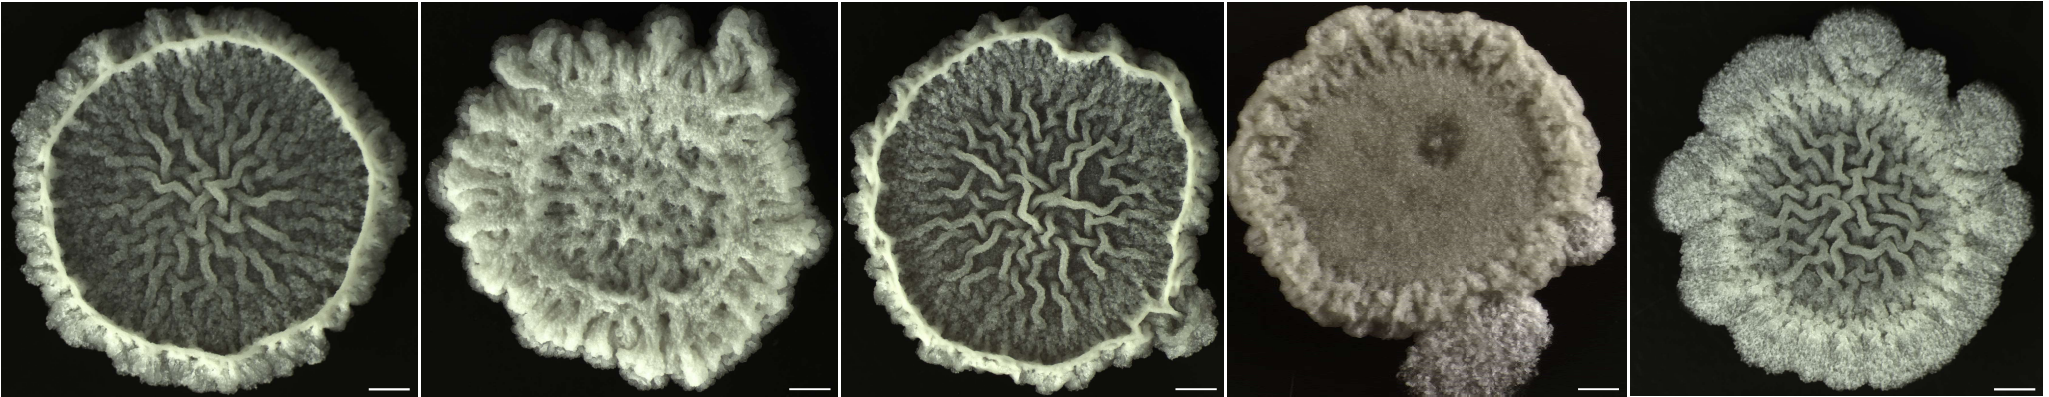

Figure S2

## Supplemental Figure Legends

**Fig S1. Background fluorescence of *B. subtilis* in pellicle biofilms.** Pellicle biofilms of NCIB 3610 cells were collected after 24 hours of incubation and were imaged with fluorescence microscopy as described in the Methods. Fluorescence of cells on the GFP and mKate2 channels was quantified using MicrobeJ.

**Fig. S2. Complementation of the *sda* and *lexA* deletion mutants show a rescue of biofilm architecture.** Shown are colony biofilms formed by the wild type strain (NCIB 3610), the *sda* deletion mutant (YCN025), the complementation of the *sda* deletion mutant (YCN258), the *lexA* deletion mutant (YCN020), and the complementation of the *lexA* deletion mutant (YCN278) on LBGM agar. Images were taken after 2 days of incubation of the biofilms at 30°C. The scale bar represents 0.25 cm.

**Supplemental Table 1: Strains and plasmids used in this study.**

| <b>Strain</b>  | <b>Parent</b> | <b>Genotype</b>                                                                                               | <b>Source</b> |
|----------------|---------------|---------------------------------------------------------------------------------------------------------------|---------------|
| DH5α           |               | An <i>E. coli</i> strain for molecular cloning                                                                | Invitrogen    |
| PY79           |               | A laboratory strain of <i>B. subtilis</i> for genetic transformation                                          | (1)           |
| 168            |               | A domesticated strain of <i>B. subtilis</i>                                                                   | (2)           |
| NCIB 3610      |               | An undomesticated strain of <i>B. subtilis</i> capable of biofilm formation                                   | (3)           |
| BKE17850       | 168           | $\Delta lexA::erm$                                                                                            | BGSC          |
| BKE25690       | 168           | $\Delta sda::erm$                                                                                             | BGSC          |
| TMN503         | 3610          | $sacA::P_{tapA}-mKate2$ , kan <sup>R</sup>                                                                    | (4)           |
| FC591          | 3610          | $amyE::P_{tapA}-lacZ$ , spec <sup>R</sup>                                                                     | (5)           |
| YCN020         | 3610          | $\Delta lexA::erm$                                                                                            | This work     |
| YCN025         | 3610          | $\Delta sda::erm$                                                                                             | This work     |
| YCN036         | 3610          | $amyE::P_{yneA}-gfp$ , chl <sup>R</sup>                                                                       | This work     |
| YCN040         | YCN036        | $sacA::P_{tapA}-mKate2$ , kan <sup>R</sup> , $amyE::P_{yneA}-gfp$ , chl <sup>R</sup>                          | This work     |
| YCN050         | YCN040        | $\Delta lexA::erm$ , $sacA::P_{tapA}-mKate2$ , kan <sup>R</sup> , $amyE::P_{yneA}-gfp$ :chl <sup>R</sup>      | This work     |
| YCN095         | 3610          | $sacA::P_{tapA}-mKate2$ , kan <sup>R</sup>                                                                    | This work     |
| YCN096         | YC121         | $\Delta sda::tet$ , $amyE::P_{tapA}-lacZ$ , spec <sup>R</sup>                                                 | This work     |
| YCN097         | YCN095        | $\Delta sda::tet$ , $sacA::P_{tapA}-mKate2$ , kan <sup>R</sup>                                                | This work     |
| YCN098         | FC591         | $\Delta lexA::erm$ , $amyE::P_{tapA}-lacZ$ , spec <sup>R</sup>                                                | This work     |
| YCN099         | YCN095        | $\Delta lexA::erm$ , $sacA::P_{tapA}-mKate2$ , kan <sup>R</sup>                                               | This work     |
| YCN100         | YCN098        | $\Delta lexA::erm$ $\Delta sda::tet$ , $amyE::P_{tapA}-lacZ$ , spec <sup>R</sup>                              | This work     |
| YCN101         | YCN099        | $\Delta lexA::erm$ $\Delta sda::tet$ , $sacA::P_{tapA}-mKate2$ , kan <sup>R</sup>                             | This work     |
| YCN258         | YCN020        | $\Delta sda::erm$ , $amyE::P_{lexA}-lexA$ , chl <sup>R</sup>                                                  | This work     |
| YCN278         | YCN025        | $\Delta lexA::erm$ , $amyE::P_{sda}-sda$ , chl <sup>R</sup>                                                   | This work     |
| <b>plasmid</b> |               |                                                                                                               |               |
| pYC121         |               | An <i>amyE</i> integration vector with a promoter-less <i>gfp</i> (mut2), chl <sup>R</sup> , amp <sup>R</sup> | (6)           |
| pDG1662        |               | An <i>amyE</i> integration vector for complementation, chl <sup>R</sup> , amp <sup>R</sup>                    | (7)           |

Abbreviations for the antibiotic resistance genes: amp, ampicillin; chl, chloramphenicol; erm, erythromycin; kan, kanamycin; spec, spectinomycin; tet, tetracycline.

## Supplemental Table 2: Oligonucleotides used in this study.

---

### Primers (5'>3')

|            |                                                   |
|------------|---------------------------------------------------|
| lexA-compF | gtacggatccttaatggacggttctgaacacgc                 |
| lexA-compR | gtacgaattcaatcactgtaaacagaccgacaa                 |
| sda-compF  | gtacgaattcgggtttctcaccaggtgtgg                    |
| sda-compR  | gtacggatccctattaagaagatacggaaataatgtccgagcgatcttc |
| PyneA-F    | gtcgaattcagcttcgtcattttcgcacct                    |
| PyneA-R    | gtcaagcttcaggaatgttgttcgcattt                     |
| sda-P1     | gtaactccgcacccgatacaaaa                           |
| sda-P2     | caattcgcctatagtgagtcgtgggagaggcacctcctaaaag       |
| sda-P3     | ccagctttgtcccttagtgagtaataggaattgtctatttt         |
| sda-P4     | gcagtggtcaatatataaaaa                             |

---

## Supplemental references

1. **Schroeder JW, Simmons LA.** 2013. Complete Genome Sequence of *Bacillus subtilis* Strain PY79. *Genome Announcements* **1**:e01085-01013.
2. **Harwood CR, Wipat A.** 1996. Sequencing and functional analysis of the genome of *Bacillus subtilis* strain 168. *FEBS Letters* **389**:84-87.
3. **Branda SS, Gonzalez-Pastor JE, Ben-Yehuda S, Losick R, Kolter R.** 2001. Fruiting body formation by *Bacillus subtilis*. *Proc Natl Acad Sci USA* **98**:11621-11626.
4. **Norman TM, Lord ND, Paulsson J, Losick R.** 2013. Memory and modularity in cell-fate decision making. *Nature* **503**:481-486.
5. **Chu F, Kearns D, B. , McLoon A, Chai Y, Kolter R, Losick R.** 2008. A novel regulatory protein governing biofilm formation in *Bacillus subtilis*. *Mol Microbiol* **68**:1117-1127.
6. **Chai Y, Chu F, Kolter R, Losick R.** 2008. Bistability and biofilm formation in *Bacillus subtilis*. *Mol Microbiol* **67**:254-263.
7. **Guérout-Fleury AM, Frandsen N, Stragier P.** 1996. Plasmids for ectopic integration in *Bacillus subtilis*. *Gene* **180**:57-61.
